# Supplementary material
Source: Research Square preprint supplement (doi:10.21203/rs.3.rs-9355992/v1)
Supplement: Supplementary file 1 [file e0c60ccfd55dd90ef494bab6.docx]

**Surgical Technique and Post-operative care details**

Both bilateral VBT and hybrid surgeries were performed under continuous neurophysiological monitoring. Thoracoscopic and retroperitoneal approaches were performed by thoracic and vascular access surgeons, respectively.

***Bilateral VBT***

T4 to L1 vertebrae were instrumented using 3 visualization ports and 3 or 4 working ports. Pleura was dissected off the lateral aspect of the vertebral bodies anterior to the rib heads sequentially along the length of the curve. A retroperitoneal approach was used to instrument vertebrae from L2 to L5. Hydroxyapatite-coated monoaxial screws were placed with a bicortical purchase under fluoroscopic visualization. Non-divided diaphragm approach, which involves a blunt dissection that does not require a suture repair during closure, was used to transfer the tether from the retroperitoneal region to the thoracic cage or vice versa. For both approaches, segmental vessels were identified, coagulated and divided. Care was taken to protect the intervertebral discs. Following the instrumentation and tether placement, set screws were tightened sequentially achieving correction through both tensioning of the tether and direct translation of the spine. At the end of the procedures, a chest tube and/or a retroperitoneal drain were placed.

***Hybrid surgery***

Regarding STF, the fusion levels were defined as follows: the upper instrumented vertebra (UIV) was selected between T2 and T4 based on preoperative shoulder balance and the structural or compensatory nature of the proximal thoracic (PT) curve. The lower instrumented vertebra (LIV) was chosen as the neutral vertebra (NV) or NV+1 depending on the degree of NV translation from the central sacral vertical line (CSVL), in accordance with the last substantially touched vertebra (LSTV) concept. All pedicle screws were placed under intra-operative CT-guided navigation. Two 6mm cobalt-chrome rods were asymmetrically contoured to the desired post-operative sagittal alignment and to achieve indirect vertebral derotation. In situ rod contouring, as well as segmental compression and distraction, were performed to optimize local coronal and sagittal alignment. Homologous bone graft was applied together with vancomycin powder. Two subfascial drains were placed.

When hybrid surgery required proximal extension of VBT instrumentation to L1 or above, ipsilateral thoracoscopic approach was used and the tether was passed from the thoracic cage to the retroperitoneal space as described above.

To minimize single-lung ventilation time during accessory thoracic VBT, the retroperitoneal approach was performed first, and lumbar screws were inserted. After completion of lumbar instrumentation, the operative lung was deflated and thoracoscopic procedures were completed.

At the end of the procedures, a chest tube and/or a retroperitoneal drain were placed. No diaphragm repair was required. Bilateral surgeries were applied as same-day two-stage surgeries. In hybrid cases, staging of the procedure was determined based on intraoperative imaging, the degree of spontaneous lumbar curve correction (SLCC) and duration of thoracic fusion surgery. In cases of relevant SLCC, VBT surgery was canceled and a decision was made to obtain a full-body standing postoperative EOS imaging to assess the need for additional lumbar VBT. In staged patients, the average interval between the two operations was 7 days.

The postoperative recovery management comprised Triflo exercises initiated by a senior respiratory therapist on day one and the patients were encouraged to continue working on these exercises hourly during hospitalization. Chest tubes were removed once the 24 h output decreased below 100 mL. Breathing home-exercises were advised for another 2 months following discharge.
